# Supplementary material
Source: publisher figshare collection journal article supplement (https://acs.figshare.com/ndownloader/files/21777900)
Supplement: Supplementary file 1 [file 21777900]

## SUPPORTING INFORMATION

# Enhanced Photogenerated Electron Transfer in a Semi-artificial Photosynthesis System based on Highly Dispersed Titanium Oxide Nanoparticles

*Xiaoqin Pan,<sup>a,b</sup> Dongna Li,<sup>b</sup> Yueping Fang,<sup>b</sup> Zhihao Liang,<sup>a</sup> Haoran Zhang,<sup>b,c</sup> Jin Zhong Zhang,<sup>d</sup> Bingfu Lei,<sup>\*a,b,c</sup> and Shiwei Song<sup>\*a</sup>*

<sup>a</sup> College of Horticulture, South China Agricultural University, Guangzhou 510642, P. R. China.

<sup>b</sup> Guangdong Provincial Engineering Technology Research Center for Optical Agriculture, College of Materials and Energy, South China Agricultural University, Guangzhou 510642, P. R. China

<sup>c</sup> Guangdong Laboratory of Lingnan Modern Agriculture, Guangzhou 510642, P. R. China

<sup>d</sup> Department of Chemistry & Biochemistry, University of California, Santa Cruz, CA 94720, USA

\*Corresponding author: E-mail address: tleibf@scau.edu.cn (B. Lei), swsong@scau.edu.cn (S. Song).

## Experimental

### Materials

Tetrabutyl titanate ( $\text{Ti}(\text{OC}_4\text{H}_9)_4$ , 99%), ethanol absolute ( $\text{CH}_3\text{CH}_2\text{OH}$ , 99%), cyclohexane ( $\text{C}_6\text{H}_{12}$ ), hydrochloric acid ( $\text{HCl}$ , 36–38%), methylene blue (MB), 2,6-dichlorophenolindophenol (DCPIP), sucrose, potassium chloride ( $\text{KCl}$ ), dibasic sodium phosphate ( $\text{Na}_2\text{HPO}_4$ ), potassium phosphate monobasic ( $\text{KH}_2\text{PO}_4$ ), and acetone were purchased from MACLIN.

### Synthesis of nano $\text{TiO}_2$

According to Liu et al.,<sup>1</sup> 36 mL  $\text{Ti}(\text{OC}_4\text{H}_9)_4$  was mixed with 90 mL ethanol and 90 mL  $\text{C}_6\text{H}_{12}$  for 10 min. Then, 9.0 mL 36%  $\text{HCl}$  was added and mixed for 10 min. The mixture was placed into a 70 °C water bath and stirred refluxing for 10 h. After cooling to room temperature, 600 mL ethanol was mixed dropwise in 2 h. After setting for 10 h, the supernatant was poured out and centrifuged at 5000 rpm for 5 min. Finally, white powder was obtained by washing with anhydrous ethanol three times. The white powder is  $\text{TiO}_2$ .

### Characterization

Transmission electron microscopy (TEM) and high resolution transmission microscopy (HRTEM) were collected on a JEOL-2010 electron microscope. X-ray diffraction (XRD) analysis was employed on PANalytical ( $\text{Cu-K}\alpha$  radiation,  $\lambda=0.154051$  nm). Fourier transform infrared

spectroscopy pattern (FTIR) was carried out on Nicolet 6700. X-ray photoelectron spectroscopy (XPS) analysis was conducted on Thermo Scientific Escalab 250Xi and element mapping by scanning electron microscopy (SEM) was conducted on Hitachi SU8220. Zeta potential and DLS measurements were carried out on Malvern Nano ZSE. UV-vis DRS and UPS measurement were conducted on and Thermo Fisher Scientific Escalab 250xi respectively. Steady-state photoluminescence (PL) emission spectrum and excited-state lifetime were conducted on Edinburgh Instruments FLS 1000.

### **MB reduction test**

Quantities of titanium dioxide powder of 0.25 mg, 2.5 mg, 5.0 mg, 25 mg, 50 mg, and 100 mg were added to 50 mL MB solution at a concentration of 10 mg L<sup>-1</sup>, respectively. After 1 h of dark stirring, the mixture was stirred under a xenon lamp with a light intensity of 190 mW·cm<sup>-2</sup> for 3 h. Then, 5 mL of mixed liquid was taken every 0.5 h, and the purified liquid was centrifuged to record the absorbance of OD<sub>664</sub>.

### **Isolation of chloroplast**

Lettuce leaves with variable treatment were homogenized in a buffer containing 0.40 M sucrose, 10 mM KCl, 30 mM Na<sub>2</sub>HPO<sub>4</sub>, and 20 mM KH<sub>2</sub>PO<sub>4</sub>, and then filtered through four layers of cotton gauze. The filtrates were subsequently centrifuged at 1000 rpm for 3 min. Supernatant liquid in

tube was centrifuged at 3000 rpm for another 3 min. Chloroplast were obtained from the residue in the bottom of the tube and spread in buffer solution.

### **Hill reaction**

Concentrations of chloroplast suspension from lettuce leaves with variable treatment were measured by means of adding 0.10 mL chloroplast suspension into a 4.9 mL mixture of ethanol and acetone for measuring the absorbance at 650 nm. 4.0 mL chloroplast suspension ( $421.74 \text{ mg}\cdot\text{L}^{-1}$ ) were mixed with 4.0 mL 10, 100, 200, 1000 2000, and 4000  $\text{mg}\cdot\text{L}^{-1}$   $\text{TiO}_2$  NPs buffer dispersion for 2 h. 2.0 mL of 12  $\mu\text{M}$  DCPIP solution was added, subsequently. Illuminated under a xenon lamp with the intensity of  $7.0 \text{ mW cm}^{-2}$  for 5 min, the absorbance spectrum was recorded at 600 nm every 1 min.

### **Ferricyanide reduction**

According to Chandra,<sup>2</sup> 1.0 mL hybrid chloroplast suspension ( $500 \text{ mg}\cdot\text{L}^{-1}$ ) was added to 2.0 mM ADP and 1.0 mM ferricyanide. After 1 min of sunlight irradiance at an intensity of  $73 \text{ mW}\cdot\text{cm}^{-2}$ , 2% trichloroacetic acid was added. Recorded The absorbance at 420 nm of the supernatant was recorded by 10 min of centrifuge at 8000 g.

### **ATP measurement**

From hybrid chloroplast suspension, 1.0 mL was added to 2.0 mM ADP. Following 1 min of sunlight irradiance at intensity of  $73 \text{ mW}\cdot\text{cm}^{-2}$ , an ATP Content Assay Kit was taken to measure the ATP content.

### **H<sub>2</sub> measurement**

25 mL chloroplast suspension ( $421.74 \text{ mg}\cdot\text{L}^{-1}$ ) was mixed with 25 mL  $500 \text{ mg}\cdot\text{L}^{-1}$  TiO<sub>2</sub> NPs buffer dispersion for 2 h. After 1 hour of illumination under a xenon lamp with a light intensity of  $190 \text{ mW}\cdot\text{cm}^{-2}$ , the hydrogen production was measured by TECHCOMP GC 7900.

### **MDA measurement**

4.0 mL chloroplast suspension ( $421.74 \text{ mg}\cdot\text{L}^{-1}$ ) was mixed with 4.0 mL  $1000 \text{ mg}\cdot\text{L}^{-1}$  TiO<sub>2</sub> buffer solution. After 5 min of illuminating under a xenon lamp with a light intensity of  $7.0 \text{ mW}\cdot\text{cm}^{-2}$ , it was centrifuged at 3000 rpm for 3 min, then 0.05 M phosphate buffer (Na<sub>2</sub>HPO<sub>4</sub>, NaH<sub>2</sub>PO<sub>4</sub>) were used to wash away the sucrose phosphate buffer three times. A MDA Content Assay Kit was taken to measure the MDA content.

### **SOD measurement**

The SOD activity was measured by a SOD Content Assay Kit.

### **Spraying on lettuce leaves**

Lettuce seeding was Italian Lettuce purchased from Guangdong Academy of Agricultural Sciences in China. When the seedlings were grown to three leaves, they were transplanted to the hydroponic rack. After 10 days of transplanting, 5.0, 50, and 100 mg·L<sup>-1</sup> of as-prepared TiO<sub>2</sub> NP dispersion solution was sprayed on the leaves and treated every 5 days. A one-way analysis of variance (ANOVA) was used to analyse the differences.

### **Sample preparation for ICP-MS**

The lettuce leaves were washed with pure water three times to clean TiO<sub>2</sub> NP covering on the surface of the leaves. After drying, 0.50 g dry sample was added to 5 mL HCl and mixed with 2.0 mL H<sub>2</sub>O<sub>2</sub>, placed into a microwave digestion system at 180 °C for 1 h.

### **Zeta potential and DLS measurement**

The Zeta potential of TiO<sub>2</sub>, CLP and the hydrate particle size of TiO<sub>2</sub> were measured by Molvern Zetasizer Nano ZS90.

## Supplementary figures and tables

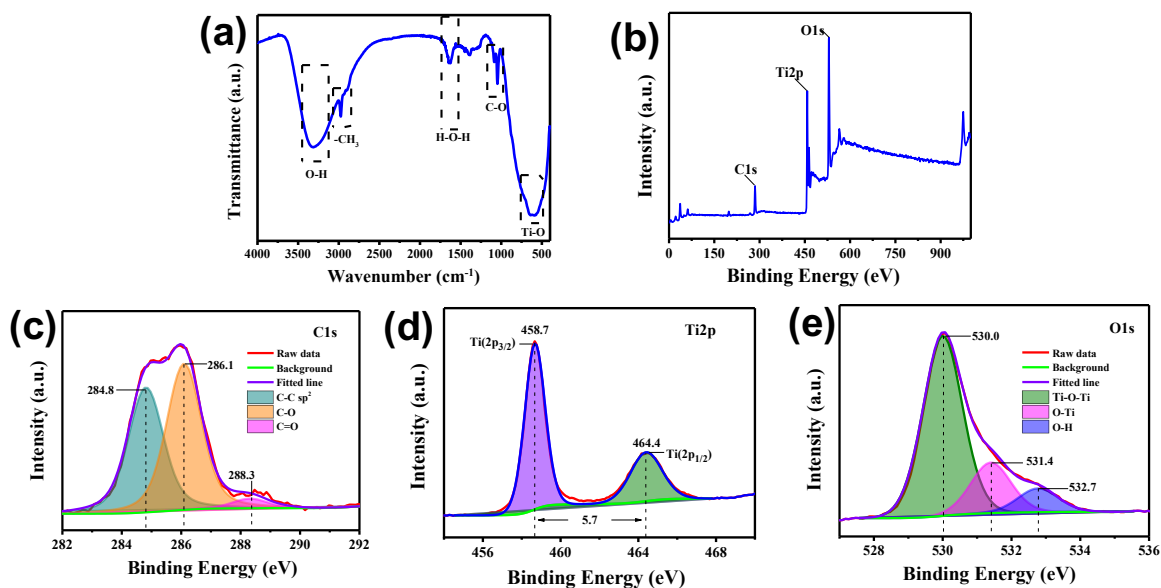

**Figure S1** (a) FTIR image of TiO<sub>2</sub>. (b) XPS image of TiO<sub>2</sub>. (c-d) XPS peak separation images of C1s, Ti(2p), and O1s.

**Table S1** DLS data of TiO<sub>2</sub>

| Sample  | PDI   | Size (d.nm) | Volume (%) | St Dev. |
|---------|-------|-------------|------------|---------|
| 1       | 0.249 | 13.04       | 100        | 6.754   |
| 2       | 0.264 | 10.68       | 100        | 6.485   |
| 3       | 0.262 | 11.72       | 100        | 6.823   |
| 4       | 0.247 | 9.738       | 100        | 6.578   |
| Average | 0.255 | 11.2945     | 100        |         |

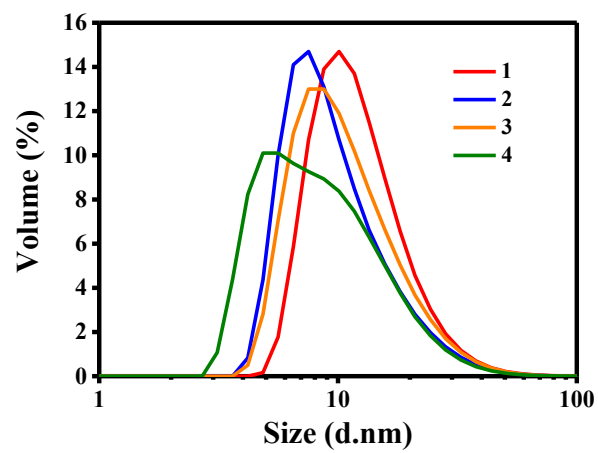

**Figure S2** Volume/Size distribution of TiO<sub>2</sub> NPs (1, 2, 3, 4 represent the repetition times)

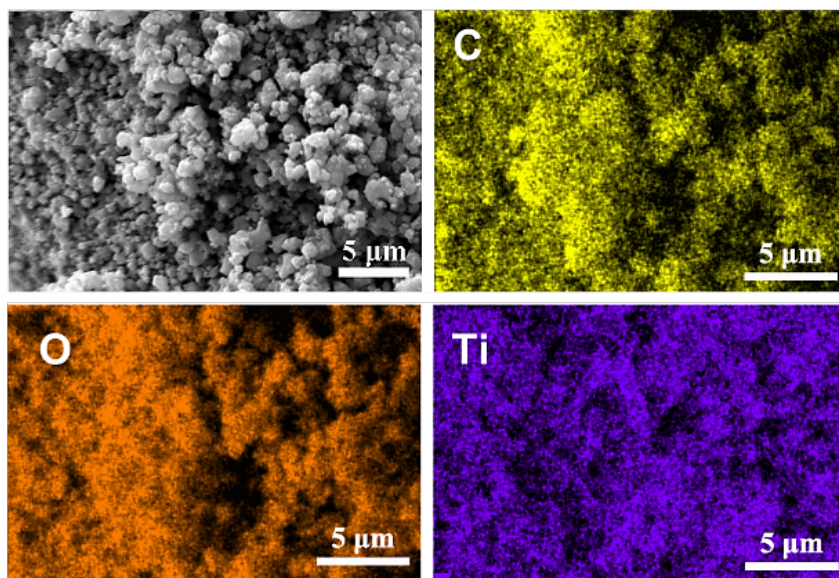

**Figure S3** Element mapping of as-prepared TiO<sub>2</sub> powder.



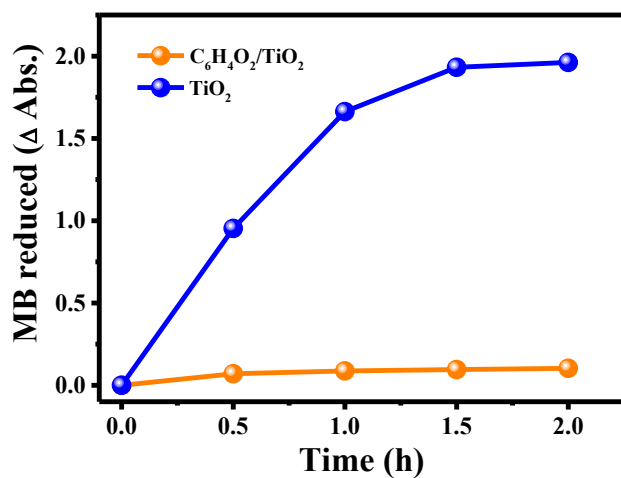

**Figure S4** MB reduction by  $\text{TiO}_2$  and with  $\text{C}_6\text{H}_4\text{O}_2$  present. (The MB reduction experiments were carried out under a xenon lamp with the intensity of  $190 \text{ mW}\cdot\text{cm}^{-2}$ , expressed as absolute difference in absorbance.)

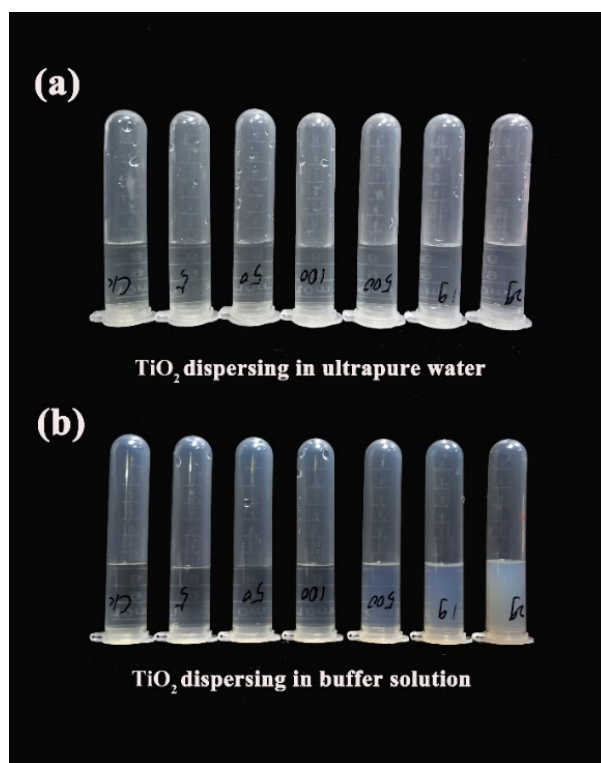

**Figure S5** (a) Variable concentrations of  $\text{TiO}_2$  dispersed in ultrapure water. (b) Variable concentrations of  $\text{TiO}_2$  dispersed in buffer solution.

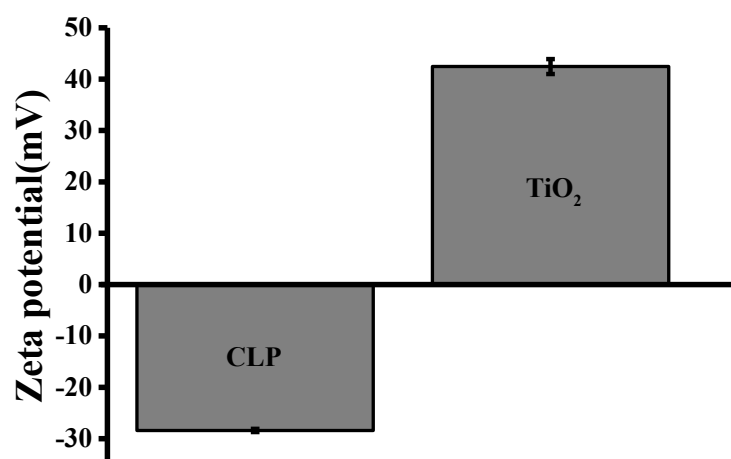

**Figure S6** Zeta potential of TiO<sub>2</sub> and CLP.

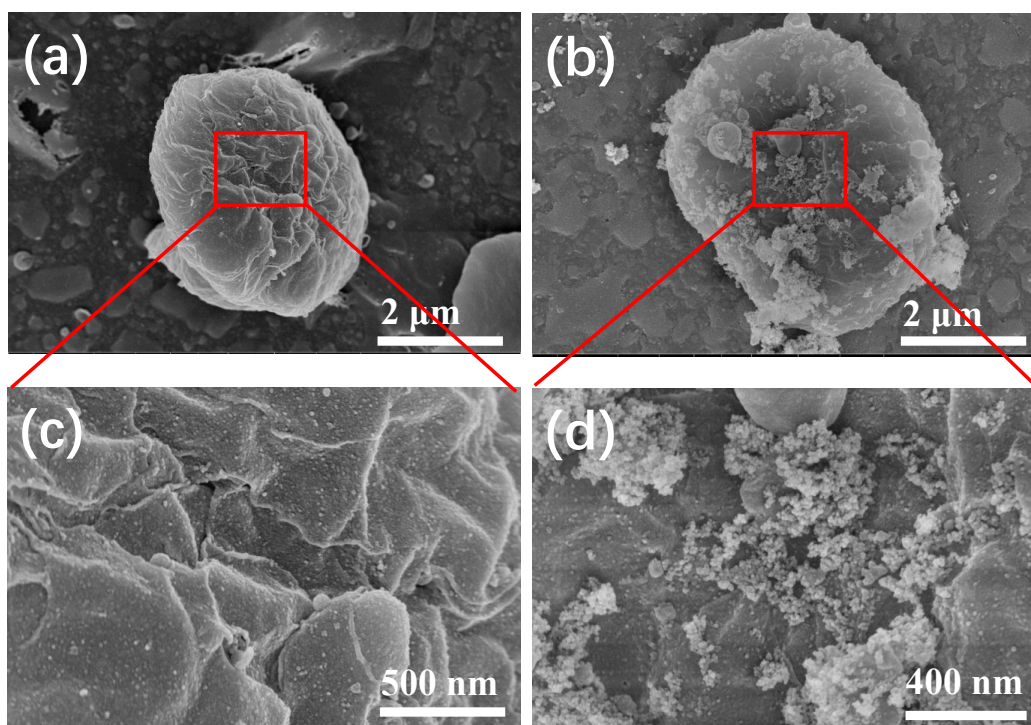

**Figure S7** (a) FESEM image of pure CLP; (b) FESEM image of TiO<sub>2</sub>/CLP; (c) Enlarged FESEM image of pure CLP; (d) Enlarged FESEM image of TiO<sub>2</sub> NPs distributed on CLP surface.

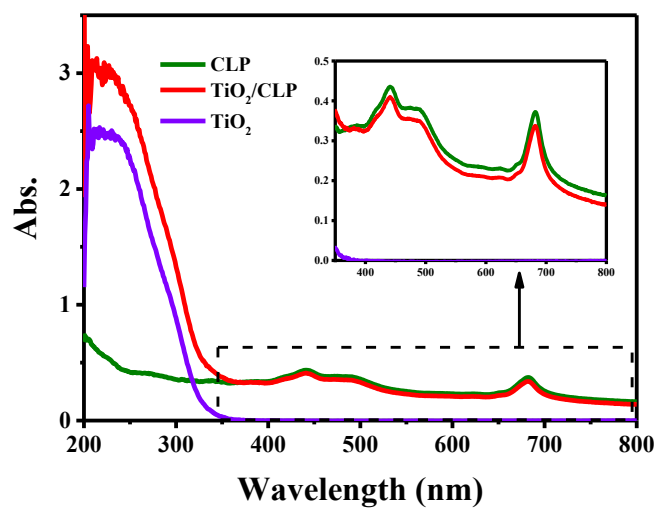

**Figure S8** UV-vis absorption spectrum of  $\text{TiO}_2$ , chloroplast, and  $\text{TiO}_2/\text{CLP}$ .

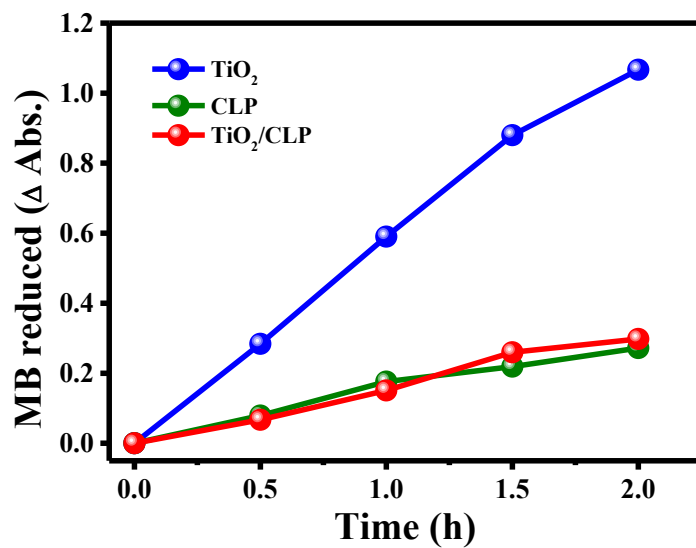

**Figure S9** MB reduction by  $\text{TiO}_2$  and  $\text{TiO}_2/\text{CLP}$  in buffer solution. (The MB reduction experiments were carried out under a xenon lamp with the intensity of  $190 \text{ mW}\cdot\text{cm}^{-2}$ , expressed as absolute difference in absorbance.)

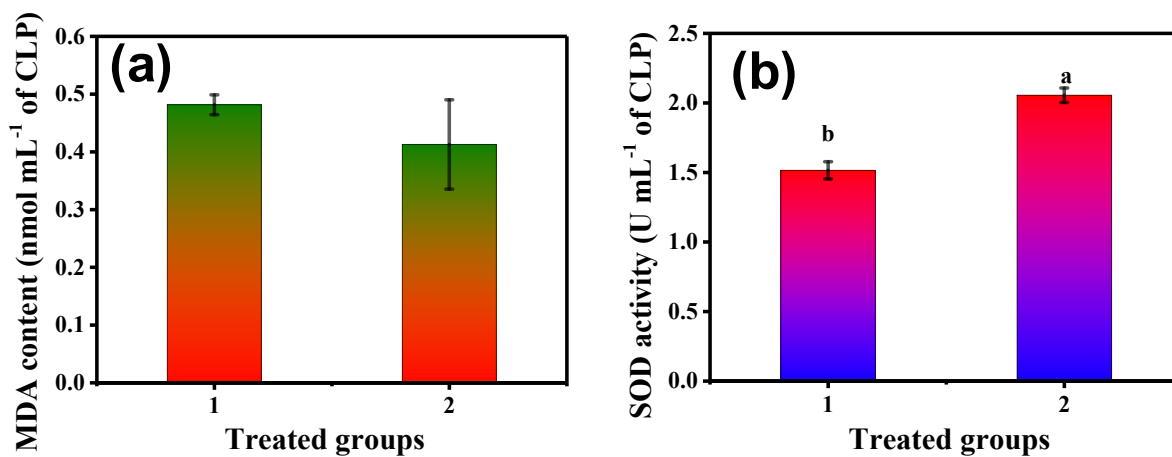

**Figure S10** (a) MDA content of CLP and TiO<sub>2</sub>/CLP after illuminating. (b) SOD activity of CLP and TiO<sub>2</sub>/CLP after illuminating. (The illumination was under a xenon lamp with the light intensity of 7.0 mW cm<sup>-2</sup>; “1” represents the CLPs and “2” represents the TiO<sub>2</sub>/CLPs.  $P < 0.05$ , “a” represents the highest grade number while “b” represents the lower grade number, the different letters mean they have significant difference.)

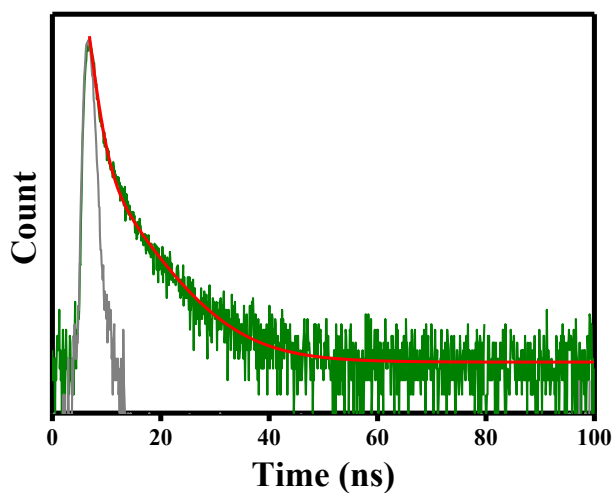

**Figure S11** TRPL decay profiles of CLP monitored at 450 nm emission.

**Table S2** Multi-exponential fitting of TiO<sub>2</sub> and TiO<sub>2</sub>/CLP

| Sample                | $\tau_1$ | A <sub>1</sub> | $\tau_2$ | A <sub>2</sub> | $\tau$      | $\chi^2$ |
|-----------------------|----------|----------------|----------|----------------|-------------|----------|
| TiO <sub>2</sub>      | 2.14126  | 11043.79959    | 10.65794 | 287.58052      | 3.118465477 | 0.99019  |
| TiO <sub>2</sub> /CLP | 1.23236  | 104668.5925    | 7.65501  | 313.39647      | 1.349632711 | 0.99404  |
| CLP                   | 1.31985  | 161119.68573   | 7.58672  | 371.58545      | 1.401841857 | 0.99261  |

Computational formula:  $\tau = (A_1 \tau_1^2 + A_2 \tau_2^2) / (A_1 \tau_1 + A_2 \tau_2)$

## REFERENCES

- (1) Liu, X.; Chen, Y.; Rao, S. H.; Pang, G. S. One Step Preparation of Highly Dispersed TiO<sub>2</sub> Nanoparticles. *Chem. Res. Chinese U.* **2015**, *31*, 688-692.  
DOI: 10.1007/s40242-015-5300-2
- (2) Chandra, S.; Pradhan, S.; Mitra, S.; Patra, P.; Bhattacharya, A.; Pramanik, P.; Goswami, A. High throughput Electron Transfer from Carbon Dots to Chloroplast: A Rationale of Enhanced Photosynthesis. *Nanoscale* **2014**, *6*, 3647-3655.  
DOI: 10.1039/c3nr06079a
